# Supplementary material
Source: Springer Nature journal article supplement (https://www.springermedizin.de/resource/supplementary/13643_2012_46_MOESM3_ESM.pdf/9681358)

## A – Death

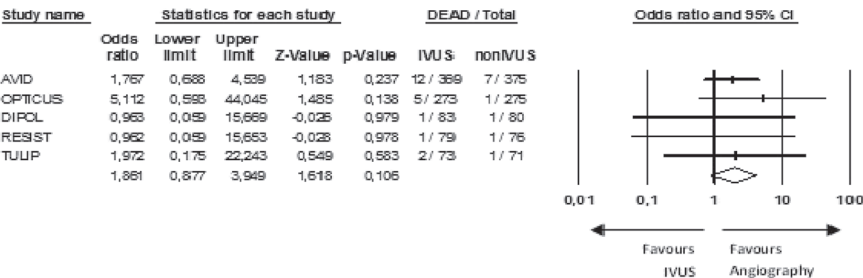

## B – MI

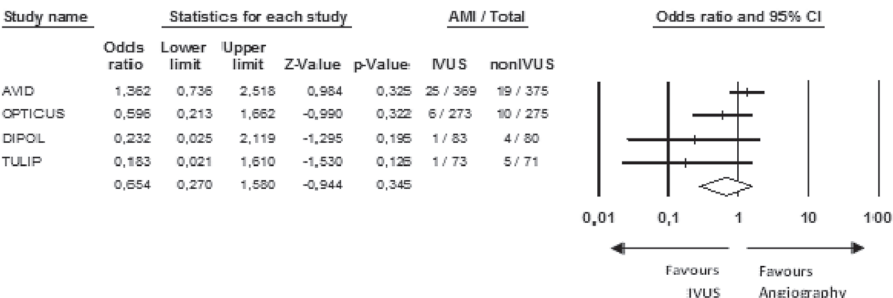

## C – MACE

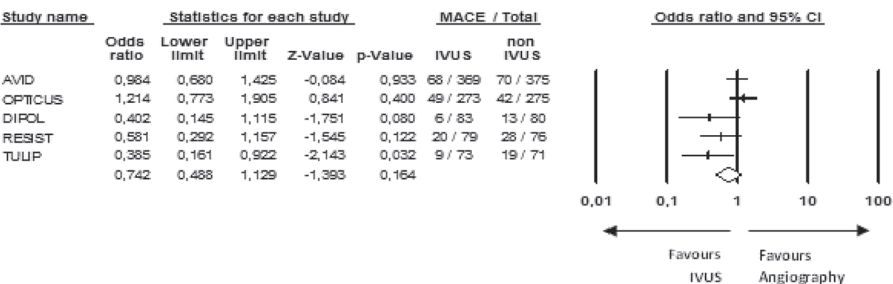

Supplement: MOESM3 [file 9681358]
